# Supplementary material
Source: PubMed Central journal article supplement (PMC3359583)
Supplement: supp_WNL.0b013e3182582ff8_Figure_e-1.pdf [file supp_WNL.0b013e3182582ff8_Figure_e-1.pdf]

# Frequency of early developmental lesions

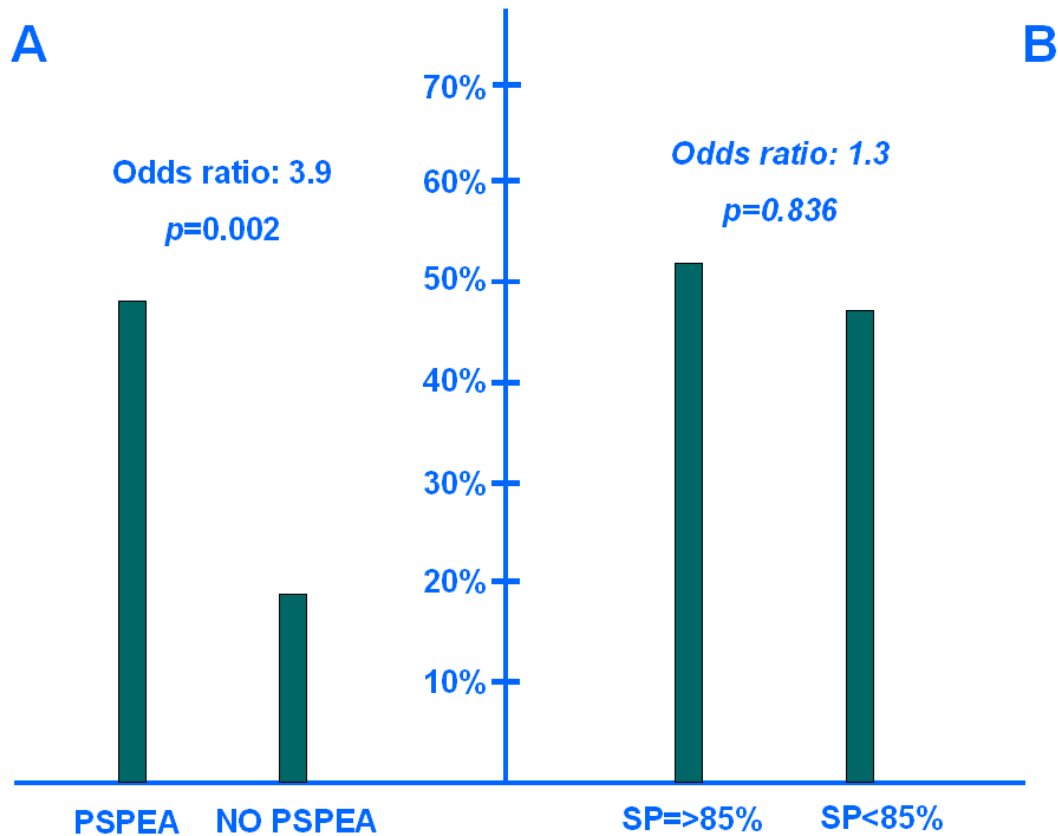

The percentage of patients with early developmental lesion is shown on the vertical axis. This percentage was compared between patients with and without PSPEA (A) and patients with SP during non-REM sleep above and below 85% (B). Early developmental lesion was 3.9 times more frequent in patients with PSPEA than in patients without PSPEA. There were not significant differences when comparing patients with SP  $\geq$  85% to patients with SP  $<$  85%.
