# Supplementary material
Source: PubMed Central journal article supplement (PMC3359583)
Supplement: supp_WNL.0b013e3182582ff8_Figure_e-2.pdf [file supp_WNL.0b013e3182582ff8_Figure_e-2.pdf]

## Frequency of thalamic involvement

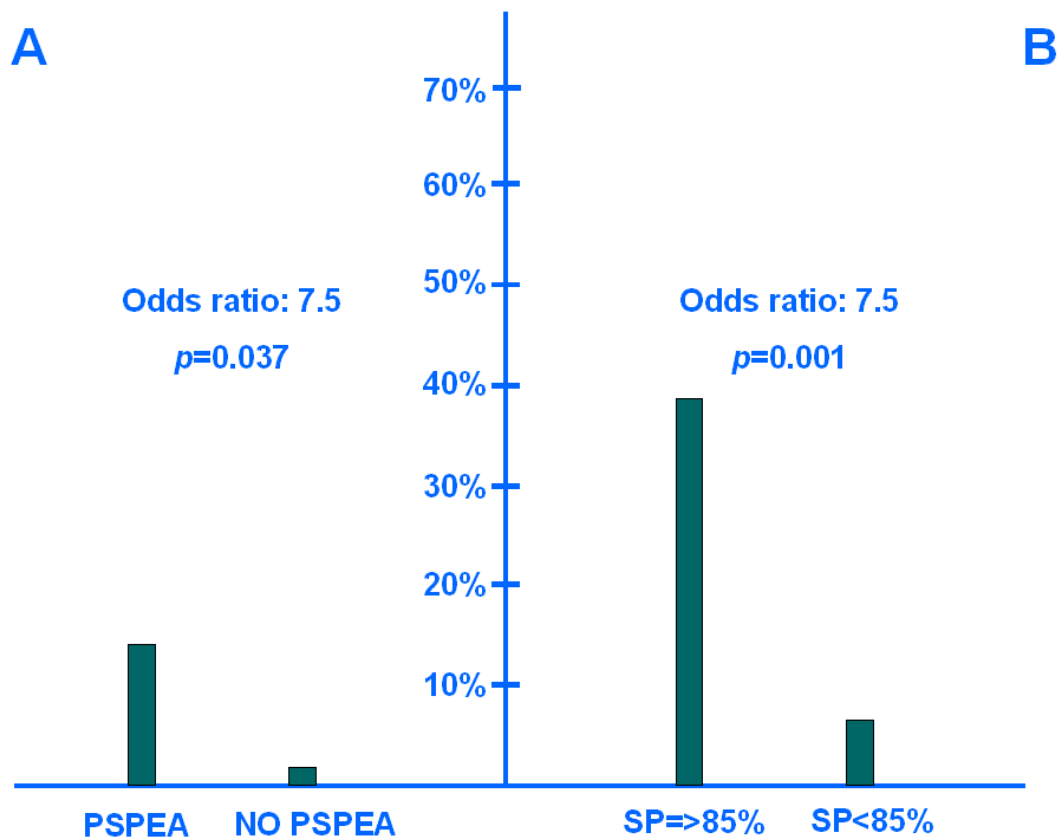

The percentage of patients with thalamic lesion is shown on the vertical axis. This percentage was compared between patients with and without PSPEA (A) and patients with SP during non-REM sleep above and below 85% (B). Thalamic lesion was 7.5 times more frequent in patients with PSPEA than in patients without PSPEA and 7.5 times more frequent in patients with SP  $\geq$  85% when compared to patients with SP < 85%.
