# Supplementary material
Source: PubMed Central journal article supplement (PMC3359583)
Supplement: supp_WNL.0b013e3182582ff8_Table_e-1.pdf [file supp_WNL.0b013e3182582ff8_Table_e-1.pdf]

## Types of EDL found in the 100 patients with PSPEA

|                                                               | Patients with<br>SP ≥ 85<br>(N=21) | Patients with<br>SP <85<br>(N=79) | Difference                                        |
|---------------------------------------------------------------|------------------------------------|-----------------------------------|---------------------------------------------------|
| Vascular lesions<br>(haemorrhagic infarct<br>and/or ischemia) | 6 (28.6%)                          | 8 (10.1%)                         | OR: 3.55 (95%CI:1.07-<br>11.74)<br><i>p</i> =0.03 |
| Periventricular<br>leukomalacia                               | 3 (14.3%)                          | 7 (8.9%)                          | OR: 1.08 (95%CI:0.21-5.64)<br><i>p</i> =1         |
| Malformation of cortical<br>development                       | 2 (9.5%)                           | 3 (3.8%)                          | OR: 2.67 (95%CI:0.42-17.1)<br><i>p</i> =0.282     |
| Nonspecific T-2 signal<br>abnormality                         | 0 (0%)                             | 4 (5.1%)                          | OR: 0.78 (95%CI:0.7-0.87)<br><i>p</i> =0.576      |
| Mesial temporal atrophy                                       | 0 (0%)                             | 3 (3.8%)                          | OR: 0.78 (95%CI:0.71-0.87)<br><i>p</i> =1         |
| Tumor                                                         | 0 (0%)                             | 3 (3.8%)                          | OR: 0.78 (95%CI:0.71-0.87)<br><i>p</i> =1         |
| Delayed myelination                                           | 0 (0%)                             | 3 (3.8%)                          | OR: 0.78 (95%CI:0.71-0.87)<br><i>p</i> =1         |
| Hemispheric atrophy                                           | 1 (4.8%)                           | 1 (1.3%)                          | OR: 3.9 (95%CI:0.23-65.1)<br><i>p</i> =0.38       |
| Holoprosencephaly                                             | 0 (0%)                             | 2 (2.5%)                          | OR: 0.79 (95%CI:0.71-0.87)<br><i>p</i> =1         |
| Arachnoid cysts                                               | 0 (0%)                             | 2 (2.5%)                          | OR: 0.79 (95%CI:0.71-0.87)<br><i>p</i> =1         |
| Agenesis of the corpus<br>callosum                            | 0 (0%)                             | 1 (1.3%)                          | OR: 0.79 (95%CI:0.71-0.87)<br><i>p</i> =1         |
| Choroid cyst                                                  | 0 (0%)                             | 0 (0%)                            |                                                   |
| Hippocampal asymmetry                                         | 0 (0%)                             | 0 (0%)                            |                                                   |

**Legend.** OR: Odds ratio. 95%CI: 95% confidence interval. PSPEA: prominent sleep potentiated epileptiform activity. N: number of patients in a particular group. *p*: *p*-value.
